# Supplementary material for: The mouse cortico–basal ganglia–thalamic network
Source: PubMed Central journal article supplement (PMC8494639; doi:10.1038/s41586-021-03993-3), 2021-10-06
Supplement: 41586_2021_3993_MOESM1_ESM.pdf [file 41586_2021_3993_MOESM1_ESM.pdf]

**Supplementary information**

---

**The mouse cortico–basal ganglia–thalamic network**

---

In the format provided by the authors and unedited

**Table 1. Striatal inputs to SNr domains by level**

| SNr domains      | Striatal inputs to SNr domain                                                                                                                                                   | SNr levels                                                       |                                                                                  |                                                                                                             |                                                                                                                   |                                                                         |                                                                                                                              |
|------------------|---------------------------------------------------------------------------------------------------------------------------------------------------------------------------------|------------------------------------------------------------------|----------------------------------------------------------------------------------|-------------------------------------------------------------------------------------------------------------|-------------------------------------------------------------------------------------------------------------------|-------------------------------------------------------------------------|------------------------------------------------------------------------------------------------------------------------------|
|                  |                                                                                                                                                                                 | ARA 81                                                           | ARA 83                                                                           | ARA 85                                                                                                      | ARA 87                                                                                                            | ARA 89                                                                  | ARA 91                                                                                                                       |
| anterolateral    | CPI.v.m.cvm                                                                                                                                                                     | CPI.v.m.cvm                                                      |                                                                                  |                                                                                                             |                                                                                                                   |                                                                         |                                                                                                                              |
| anteromedial     | CPI.d.m.cd                                                                                                                                                                      | CPI.d.m.cd                                                       |                                                                                  |                                                                                                             |                                                                                                                   |                                                                         |                                                                                                                              |
| central          | CPI.d.m.cd<br>CPI.v.m.cvm                                                                                                                                                       |                                                                  | CPI.d.m.cd<br>CPI.v.m.cvm                                                        | CPI.d.m.cd<br>CPI.v.m.cvm                                                                                   |                                                                                                                   |                                                                         |                                                                                                                              |
| centrolateral    | CPI.v.l.cvl<br>CPc.i.v.m<br>CPc.i.vl                                                                                                                                            |                                                                  | CPI.v.l.cvl                                                                      | CPI.v.l.cvl<br>CPc.i.v.m<br>CPc.i.vl                                                                        |                                                                                                                   |                                                                         |                                                                                                                              |
| dorsal           | CPr.l.v.m<br>CPI.v.m.v.m<br>CPI.v.m.v<br>CPI.v.m.cvm<br>CPc.v.v.m<br>ACBc<br>ACBsh.l<br>ACBsh.m                                                                                 | CPr.l.v.m<br>CPI.v.m.v.m<br>CPI.v.m.v<br>ACBsh.l                 | CPr.l.v.m<br>CPI.v.m.v.m<br>CPI.v.m.v<br>ACBsh.l                                 | CPI.v.m.v.m<br>CPI.v.m.v<br>CPc.v.v.m<br>ACBsh.l                                                            | CPI.v.m.v.m<br>CPI.v.m.v<br>CPI.v.m.cvm<br>ACBc<br>ACBsh.l<br>ACBsh.m                                             | CPI.v.m.v.m<br>CPI.v.m.v<br>CPI.v.m.cvm<br>CPc.v.v.m<br>ACBc<br>ACBsh.l | CPr.l.v.m<br>CPI.v.m.v.m<br>CPI.v.m.v<br>CPI.v.m.cvm                                                                         |
| dorsomedial      | ACBc<br>ACBsh.m                                                                                                                                                                 | ACBc<br>ACBsh.m                                                  | ACBc<br>ACBsh.m                                                                  | ACBc<br>ACBsh.m                                                                                             |                                                                                                                   |                                                                         |                                                                                                                              |
| external lateral | CPext.cv                                                                                                                                                                        | CPext.cv                                                         |                                                                                  |                                                                                                             | CPext.cv                                                                                                          |                                                                         |                                                                                                                              |
| lateral          | CPc.d.dm<br>CPc.d.v.m<br>CPc.i.d<br>CPc.i.vl<br>CPc.i.v.m<br>CPc.v.vl<br>CPc.v.v.m<br>CPext.d<br>CPext.cv<br>CPext.rv                                                           |                                                                  | CPc.d.v.m<br>CPc.i.d<br>CPc.i.v.m                                                | CPc.i.d                                                                                                     | CPc.d.dm<br>CPc.d.v.m<br>CPc.i.d<br>CPc.i.vl<br>CPc.i.v.m<br>CPc.v.vl                                             | CPc.d.dm<br>CPc.d.v.m<br>CPc.i.d<br>CPc.i.v.m                           | CPc.d.v.m<br>CPc.v.v.m<br>CPext.d<br>CPext.cv                                                                                |
| lower limb       | CPI.d.l.imd (II)<br>CPI.v.l.cvl<br>CPc.d.dl<br>CPc.i.vl                                                                                                                         |                                                                  |                                                                                  |                                                                                                             |                                                                                                                   | CPI.d.l.imd (II)<br>CPI.v.l.cvl<br>CPc.i.vl                             | CPI.d.l.imd (II)<br>CPc.d.dl                                                                                                 |
| medial           | CPr.m<br>CPr.imd<br>CPr.imv<br>CPr.l.ls<br>CPr.l.v.m<br>CPI.d.m.d<br>CPI.d.m.dl<br>CPI.d.m.dm<br>CPI.d.m.im<br>CPI.d.l.d (tr)<br>CPc.d.dm<br>ACBsh.l                            | CPr.m<br>CPr.imv<br>CPI.d.m.d<br>CPI.d.m.im<br>CPc.d.dm          | CPr.m<br>CPr.imd<br>CPr.imv<br>CPr.l.ls<br>CPI.d.m.d<br>CPI.d.m.dl<br>CPI.d.m.im | CPr.m<br>CPr.imd<br>CPr.imv<br>CPr.l.ls<br>CPr.l.v.m<br>CPI.d.m.d<br>CPI.d.m.dl<br>CPI.d.m.dm<br>CPI.d.m.im | CPr.m<br>CPr.imd<br>CPr.imv<br>CPr.l.ls<br>CPI.d.m.d<br>CPI.d.m.dm<br>CPI.d.m.im                                  | CPr.m<br>CPr.imv<br>CPI.d.m.d<br>CPI.d.m.dm<br>CPI.d.m.im               | CPr.m<br>CPr.imd<br>CPr.l.ls<br>CPI.d.m.d<br>CPI.d.m.dl<br>CPI.d.m.dm<br>CPI.d.m.im<br>CPI.d.l.d (tr)<br>CPc.d.dm<br>ACBsh.l |
| oro-brachial     | CPr.l.v.m<br>CPI.v.l.imv (ul)<br>CPI.v.l.v (m/i)<br>CPI.v.l.vt (m/o)<br>CPI.v.l.cvl<br>CPc.i.d<br>CPc.i.vl<br>CPc.v.vl<br>CPc.v.v.m                                             | CPI.v.l.imv (ul)<br>CPI.v.l.v (m/i)<br>CPc.v.vl                  | CPI.v.l.imv (ul)<br>CPI.v.l.v (m/i)<br>CPc.i.vl                                  | CPI.v.l.imv (ul)<br>CPI.v.l.v (m/i)<br>CPI.v.l.vt (m/o)                                                     | CPI.v.l.imv (ul)<br>CPI.v.l.v (m/i)<br>CPI.v.l.vt (m/o)<br>CPc.v.v.m                                              | CPr.l.v.m<br>CPI.v.l.imv (ul)<br>CPI.v.l.v (m/i)<br>CPI.v.l.vt (m/o)    | CPI.v.l.imv (ul)<br>CPI.v.l.v (m/i)<br>CPI.v.l.vt (m/o)<br>CPI.v.l.cvl<br>CPc.i.d<br>CPc.i.vl                                |
| orofacial        | CPI.v.l.vt (m/o)<br>CPc.v.v.m                                                                                                                                                   | CPI.v.l.vt (m/o)<br>CPc.v.v.m                                    | CPI.v.l.vt (m/o)<br>CPc.v.v.m                                                    |                                                                                                             |                                                                                                                   |                                                                         |                                                                                                                              |
| paralateral      | CPc.i.v.m<br>CPc.v.vl<br>CPext.cv<br>CPext.rv                                                                                                                                   |                                                                  | CPc.v.vl<br>CPext.cv<br>CPext.rv                                                 | CPc.v.vl<br>CPext.rv                                                                                        |                                                                                                                   | CPc.v.vl<br>CPext.rv                                                    | CPc.i.v.m<br>CPc.v.vl<br>CPext.rv                                                                                            |
| ventral          | CPr.imd<br>CPr.l.ls<br>CPr.l.v.m<br>CPI.d.m.cd<br>CPI.d.m.dl<br>CPI.d.m.dm<br>CPI.d.l.d (tr)<br>CPI.d.l.imd (II)<br>CPI.v.l.cvl<br>CPc.d.dl<br>CPc.d.dm<br>CPc.d.v.m<br>CPc.i.d | CPI.d.m.dl<br>CPI.d.l.d (tr)<br>CPc.d.dl<br>CPc.d.v.m<br>CPc.i.d | CPI.d.m.dm<br>CPI.d.l.d (tr)<br>CPc.d.dl<br>CPc.d.dm                             | CPI.d.l.d (tr)<br>CPc.d.dl<br>CPc.d.dm                                                                      | CPr.imd<br>CPr.l.v.m<br>CPI.d.m.cd<br>CPI.d.m.dl<br>CPI.d.l.d (tr)<br>CPI.d.l.imd (II)<br>CPI.v.l.cvl<br>CPc.d.dl | CPr.l.ls<br>CPI.d.m.dl<br>CPI.d.l.d (tr)<br>CPc.d.dl                    |                                                                                                                              |

Supplementary Table 2. Striatal inputs to GPe domains by level

| GPe domains | Striatal inputs to GPe domain                                                     | GPe levels                               |                                                                    |                                                                            |                                                        |                                                          |                                    |
|-------------|-----------------------------------------------------------------------------------|------------------------------------------|--------------------------------------------------------------------|----------------------------------------------------------------------------|--------------------------------------------------------|----------------------------------------------------------|------------------------------------|
|             |                                                                                   | ARA 58                                   | ARA 60                                                             | ARA 62                                                                     | ARA 64                                                 | ARA 66                                                   | ARA 68                             |
| 1           | CPI.v.m.v.m<br>CPC.i.v.m<br>ACBc<br>ACBsh.m                                       | CPI.v.m.v.m<br>ACBc<br>ACBsh.m           | CPI.v.m.v.m<br>CPC.i.v.m<br>ACBc                                   |                                                                            |                                                        |                                                          |                                    |
| 2           | CPr.imv                                                                           | CPr.imv                                  |                                                                    |                                                                            |                                                        |                                                          |                                    |
| 3           | CPr.m<br>CPI.d.m.d<br>CPI.d.m.dm<br>CPI.d.m.im<br>CPC.d.dm                        | CPr.m<br>CPI.d.m.dm<br>CPI.d.m.im        | CPr.m<br>CPI.d.m.d<br>CPI.d.m.dm                                   | CPI.d.m.d<br>CPI.d.m.dm<br>CPI.d.m.im<br>CPC.d.dm                          |                                                        |                                                          |                                    |
| 4           | CPr.imd<br>CPI.d.m.d                                                              | CPr.imd<br>CPI.d.m.d                     |                                                                    |                                                                            |                                                        |                                                          |                                    |
| 5           | CPI.d.m.cd<br>CPI.v.m.cvm<br>CPC.d.dm                                             | CPI.d.m.cd<br>CPI.v.m.cvm<br>CPC.d.dm    | CPI.v.m.cvm<br>CPC.d.dm                                            |                                                                            |                                                        |                                                          |                                    |
| 6           | CPr.imd<br>CPI.d.l.d (tr)<br>CPI.d.l.d.r<br>CPI.d.m.dl<br>CPI.v.l.cvl<br>CPC.d.dl | CPI.d.l.d.r<br>CPI.d.m.dl<br>CPI.v.l.cvl | CPr.imd<br>CPI.d.l.d (tr)<br>CPI.d.l.d.r<br>CPI.d.m.dl<br>CPC.d.dl |                                                                            |                                                        |                                                          |                                    |
| 7           | CPr.l.ls                                                                          | CPr.l.ls                                 |                                                                    |                                                                            |                                                        |                                                          |                                    |
| 8           | CPI.v.l.imv.r<br>CPC.i.v.m                                                        | CPI.v.l.imv.r<br>CPC.i.v.m               |                                                                    |                                                                            |                                                        |                                                          |                                    |
| 9           | CPI.v.l.v.r<br>CPI.v.l.vt (m/o)                                                   | CPI.v.l.v.r<br>CPI.v.l.vt (m/o)          | CPI.v.l.vt (m/o)                                                   | CPI.v.l.vt (m/o)                                                           |                                                        |                                                          |                                    |
| 10          | CPr.l.v.m<br>CPI.v.m.v<br>CPC.v.v.m<br>ACBsh.l<br>ACBsh.m                         | CPr.l.v.m<br>CPI.v.m.v<br>ACBsh.l        | CPI.v.m.v<br>CPC.v.v.m<br>ACBsh.l<br>ACBsh.m                       |                                                                            |                                                        |                                                          |                                    |
| 11          | CPc.v.v.m<br>CPext.cv                                                             | CPc.v.v.m                                |                                                                    | CPc.v.v.m                                                                  | CPc.v.v.m                                              | CPc.v.v.m<br>CPext.cv                                    |                                    |
| 12          | CPr.imv<br>CPI.d.m.cd<br>CPI.d.m.im                                               |                                          | CPr.imv<br>CPI.d.m.cd<br>CPI.d.m.im                                |                                                                            |                                                        |                                                          |                                    |
| 13          | CPr.l.ls<br>CPr.l.v.m                                                             |                                          | CPr.l.ls<br>CPr.l.v.m                                              |                                                                            |                                                        |                                                          |                                    |
| 14          | CPI.v.l.cvl<br>CPC.d.v.m                                                          |                                          | CPI.v.l.cvl<br>CPC.d.v.m                                           |                                                                            |                                                        |                                                          |                                    |
| 15          | CPI.d.l.imd (II)<br>CPI.v.l.imv.r                                                 |                                          | CPI.d.l.imd (II)<br>CPI.v.l.imv.r                                  |                                                                            |                                                        |                                                          |                                    |
| 16          | CPI.v.l.imv (ul)                                                                  |                                          | CPI.v.l.imv (ul)                                                   | CPI.v.l.imv (ul)                                                           | CPI.v.l.imv (ul)                                       |                                                          |                                    |
| 17          | CPI.v.l.v (m/i)<br>CPI.v.l.v.r                                                    |                                          | CPI.v.l.v (m/i)<br>CPI.v.l.v.r                                     | CPI.v.l.v (m/i)<br>CPI.v.l.v.r                                             | CPI.v.l.v (m/i)                                        |                                                          |                                    |
| 18          | CPr.imd<br>CPr.l.ls<br>CPI.v.m.v<br>CPI.v.m.v.m                                   |                                          |                                                                    | CPr.imd<br>CPr.l.ls<br>CPI.v.m.v<br>CPI.v.m.v.m                            |                                                        |                                                          |                                    |
| 19          | ACBsh.l                                                                           |                                          |                                                                    | ACBsh.l                                                                    |                                                        |                                                          |                                    |
| 20          | CPr.imv<br>CPI.v.m.cvm<br>CPC.i.v.m                                               |                                          |                                                                    | CPr.imv<br>CPI.v.m.cvm<br>CPC.i.v.m                                        |                                                        |                                                          |                                    |
| 21          | CPI.d.m.cd                                                                        |                                          |                                                                    | CPI.d.m.cd                                                                 |                                                        |                                                          |                                    |
| 22          | CPC.d.v.m                                                                         |                                          |                                                                    | CPC.d.v.m                                                                  |                                                        |                                                          |                                    |
| 23          | CPI.d.l.d.r<br>CPI.d.m.dl                                                         |                                          |                                                                    | CPI.d.l.d.r<br>CPI.d.m.dl                                                  |                                                        |                                                          |                                    |
| 24          | CPI.v.l.cvl<br>CPC.d.dl                                                           |                                          |                                                                    | CPI.v.l.cvl<br>CPC.d.dl                                                    |                                                        |                                                          |                                    |
| 25          | CPI.d.l.d (tr)<br>CPI.d.l.imd (II)<br>CPI.v.l.imv.r<br>CPC.i.d<br>CPC.i.vl        |                                          |                                                                    | CPI.d.l.d (tr)<br>CPI.d.l.imd (II)<br>CPI.v.l.imv.r<br>CPC.i.d<br>CPC.i.vl |                                                        |                                                          |                                    |
| 26          | CPI.d.m.dm<br>CPC.d.dl<br>CPC.d.dm<br>CPC.i.d                                     |                                          |                                                                    |                                                                            | CPI.d.m.dm<br>CPC.d.dl<br>CPC.d.dm<br>CPC.i.d          |                                                          |                                    |
| 27          | CPI.d.l.d (tr)<br>CPI.d.m.dl<br>CPI.v.l.cvl<br>CPext.d                            |                                          |                                                                    |                                                                            | CPI.d.l.d (tr)<br>CPI.d.m.dl<br>CPI.v.l.cvl<br>CPext.d |                                                          |                                    |
| 28          | CPI.d.l.imd (II)                                                                  |                                          |                                                                    | CPI.d.l.imd (II)                                                           |                                                        |                                                          |                                    |
| 29          | CPC.i.vl                                                                          |                                          |                                                                    | CPC.i.vl                                                                   |                                                        |                                                          |                                    |
| 30          | CPr.l.v.m<br>CPI.v.l.vt (m/o)<br>CPC.v.vl<br>CPext.rv                             |                                          |                                                                    | CPr.l.v.m<br>CPI.v.l.vt (m/o)<br>CPC.v.vl<br>CPext.rv                      | CPr.l.v.m<br>CPC.v.vl<br>CPext.rv                      |                                                          |                                    |
| 31          | CPC.d.dm                                                                          |                                          |                                                                    |                                                                            |                                                        | CPC.d.dm                                                 |                                    |
| 32          | CPC.d.dl<br>CPC.d.v.m<br>CPC.i.d<br>CPC.i.v.m<br>CPext.d                          |                                          |                                                                    |                                                                            |                                                        | CPC.d.dl<br>CPC.d.v.m<br>CPC.i.d<br>CPC.i.v.m<br>CPext.d |                                    |
| 33          | CPc.v.v.m<br>CPext.cv                                                             |                                          |                                                                    |                                                                            |                                                        |                                                          | CPc.v.v.m<br>CPext.cv              |
| 34          | CPC.d.dm<br>CPC.d.v.m<br>CPC.i.v.m                                                |                                          |                                                                    |                                                                            |                                                        |                                                          | CPC.d.dm<br>CPC.d.v.m<br>CPC.i.v.m |
| 35          | CPext.d                                                                           |                                          |                                                                    |                                                                            |                                                        |                                                          | CPext.d                            |
| 36          | CPext.rv                                                                          |                                          |                                                                    |                                                                            |                                                        |                                                          | CPext.rv                           |
